# Supplementary material
Source: PubMed Central journal article supplement (PMC5802621)

## **Online Data Supplement**

### **Prenatal and Early-Life Fructose, Fructose-Containing Beverages, and Mid-Childhood Asthma**

Lakiea S. Wright, MD, MAT, MPH; Sheryl L. Rifas-Shiman, MPH; Emily Oken, MD, MPH; Augusto A Litonjua, MD, MPH; and Diane R. Gold, MD, MPH

**Table E1.** Associations of maternal pregnancy (1<sup>st</sup> and 2<sup>nd</sup> trimester average) and early childhood sugar sweetened beverages, juice, and total fructose intake (Quartiles 2, 3, and 4 v. Quartile 1) with hsCRP, IL-6, and TNFR2 levels (log transformed) in mid-childhood.

|                                             | N   | Model 0<br>β (95% CI) | Model 1<br>β (95% CI) | Model 2<br>β (95% CI) |
|---------------------------------------------|-----|-----------------------|-----------------------|-----------------------|
| <b>β (95% CI) for log transformed hsCRP</b> |     |                       |                       |                       |
| <i>Maternal prenatal</i>                    |     |                       |                       |                       |
| Sugar sweetened beverages                   | 526 |                       |                       |                       |
| . Quartile 1                                |     | 0.0 (ref)             | 0.0 (ref)             | 0.0 (ref)             |
| . Quartile 2                                |     | 0.01 (-0.39, 0.42)    | -0.07 (-0.46, 0.33)   | -0.09 (-0.46, 0.28)   |
| . Quartile 3                                |     | 0.40 (0.01, 0.79)     | 0.26 (-0.12, 0.65)    | 0.18 (-0.17, 0.54)    |
| . Quartile 4                                |     | 0.21 (-0.18, 0.60)    | -0.05 (-0.44, 0.34)   | -0.13 (-0.50, 0.24)   |
| Juice                                       | 526 |                       |                       |                       |
| . Quartile 1                                |     | 0.0 (ref)             | 0.0 (ref)             | 0.0 (ref)             |
| . Quartile 2                                |     | 0.18 (-0.24, 0.59)    | 0.15 (-0.25, 0.55)    | 0.20 (-0.17, 0.58)    |
| . Quartile 3                                |     | 0.03 (-0.37, 0.43)    | 0.05 (-0.34, 0.44)    | 0.14 (-0.23, 0.50)    |
| . Quartile 4                                |     | 0.20 (-0.20, 0.59)    | 0.10 (-0.28, 0.49)    | 0.17 (-0.19, 0.53)    |
| Total fructose                              | 526 |                       |                       |                       |
| . Quartile 1                                |     | 0.0 (ref)             | 0.0 (ref)             | 0.0 (ref)             |
| . Quartile 2                                |     | -0.47 (-0.87,-0.06)   | -0.45 (-0.84,-0.05)   | -0.47 (-0.84,-0.10)   |
| . Quartile 3                                |     | 0.03 (-0.36, 0.43)    | -0.05 (-0.44, 0.33)   | -0.07 (-0.44, 0.29)   |
| . Quartile 4                                |     | -0.09 (-0.49, 0.32)   | -0.17 (-0.57, 0.24)   | -0.25 (-0.62, 0.13)   |
| <i>Early childhood</i>                      |     |                       |                       |                       |
| Sugar sweetened beverages                   | 469 |                       |                       |                       |
| . Quartile 1                                |     | 0.0 (ref)             | 0.0 (ref)             | 0.0 (ref)             |
| . Quartile 2                                |     | 0.00 (-0.44, 0.44)    | -0.04 (-0.47, 0.38)   | -0.06 (-0.46, 0.34)   |
| . Quartile 3                                |     | 0.39 (-0.03, 0.82)    | 0.19 (-0.23, 0.62)    | 0.23 (-0.17, 0.63)    |
| . Quartile 4                                |     | 0.47 (0.10, 0.84)     | 0.35 (-0.05, 0.74)    | 0.36 (-0.01, 0.74)    |
| Juice                                       | 469 |                       |                       |                       |
| . Quartile 1                                |     | 0.0 (ref)             | 0.0 (ref)             | 0.0 (ref)             |
| . Quartile 2                                |     | -0.05 (-0.42, 0.33)   | 0.01 (-0.36, 0.37)    | 0.07 (-0.27, 0.41)    |
| . Quartile 3                                |     | 0.16 (-0.30, 0.62)    | 0.05 (-0.40, 0.50)    | -0.03 (-0.45, 0.39)   |
| . Quartile 4                                |     | 0.13 (-0.28, 0.55)    | 0.17 (-0.23, 0.57)    | 0.23 (-0.15, 0.61)    |
| Total fructose                              | 469 |                       |                       |                       |
| . Quartile 1                                |     | 0.0 (ref)             | 0.0 (ref)             | 0.0 (ref)             |
| . Quartile 2                                |     | 0.11 (-0.31, 0.52)    | 0.11 (-0.29, 0.51)    | 0.00 (-0.38, 0.37)    |
| . Quartile 3                                |     | 0.12 (-0.30, 0.55)    | 0.08 (-0.34, 0.49)    | -0.08 (-0.47, 0.31)   |
| . Quartile 4                                |     | 0.27 (-0.13, 0.68)    | 0.18 (-0.21, 0.57)    | 0.11 (-0.26, 0.48)    |

**β (95% CI) for log transformed IL6**

|                           |     |                     |                     |
|---------------------------|-----|---------------------|---------------------|
| <i>Maternal prenatal</i>  |     |                     |                     |
| Sugar sweetened beverages | 504 |                     |                     |
| . Quartile 1              |     | 0.0 (ref)           | 0.0 (ref)           |
| . Quartile 2              |     | -0.06 (-0.27, 0.16) | -0.08 (-0.29, 0.14) |
| . Quartile 3              |     | 0.13 (-0.07, 0.34)  | 0.10 (-0.10, 0.30)  |
| . Quartile 4              |     | 0.09 (-0.12, 0.30)  | 0.03 (-0.19, 0.24)  |
| Juice                     | 504 |                     |                     |
| . Quartile 1              |     | 0.0 (ref)           | 0.0 (ref)           |
| . Quartile 2              |     | 0.11 (-0.11, 0.33)  | 0.11 (-0.12, 0.33)  |
| . Quartile 3              |     | 0.04 (-0.17, 0.25)  | 0.06 (-0.15, 0.27)  |
| . Quartile 4              |     | 0.16 (-0.05, 0.37)  | 0.13 (-0.08, 0.34)  |
| Total fructose            | 504 |                     |                     |
| . Quartile 1              |     |                     |                     |
| . Quartile 2              |     | -0.02 (-0.23, 0.20) | -0.01 (-0.23, 0.20) |
| . Quartile 3              |     | 0.11 (-0.09, 0.32)  | 0.06 (-0.15, 0.27)  |
| . Quartile 4              |     | 0.03 (-0.19, 0.25)  | 0.00 (-0.22, 0.22)  |
| <i>Early childhood</i>    |     |                     |                     |
| Sugar sweetened beverages | 450 |                     |                     |
| . Quartile 1              |     | 0.0 (ref)           | 0.0 (ref)           |
| . Quartile 2              |     | -0.03 (-0.26, 0.21) | -0.05 (-0.29, 0.18) |
| . Quartile 3              |     | 0.14 (-0.09, 0.36)  | 0.07 (-0.16, 0.31)  |
| . Quartile 4              |     | 0.11 (-0.09, 0.31)  | 0.08 (-0.14, 0.29)  |
| Juice                     | 450 |                     |                     |
| . Quartile 1              |     | 0.0 (ref)           | 0.0 (ref)           |
| . Quartile 2              |     | 0.08 (-0.12, 0.28)  | 0.07 (-0.13, 0.27)  |
| . Quartile 3              |     | 0.06 (-0.18, 0.30)  | -0.03 (-0.27, 0.22) |
| . Quartile 4              |     | 0.04 (-0.18, 0.26)  | 0.00 (-0.22, 0.22)  |
| Total fructose            | 450 |                     |                     |
| . Quartile 1              |     | 0.0 (ref)           | 0.0 (ref)           |
| . Quartile 2              |     | 0.11 (-0.11, 0.34)  | 0.12 (-0.11, 0.34)  |
| . Quartile 3              |     | 0.03 (-0.19, 0.26)  | 0.00 (-0.22, 0.23)  |
| . Quartile 4              |     | 0.09 (-0.12, 0.31)  | 0.05 (-0.16, 0.26)  |

**β (95% CI) for log transformed sTNFR2**

|                           |     |                     |                     |
|---------------------------|-----|---------------------|---------------------|
| <i>Maternal prenatal</i>  |     |                     |                     |
| Sugar sweetened beverages | 504 |                     |                     |
| . Quartile 1              |     | 0.0 (ref)           | 0.0 (ref)           |
| . Quartile 2              |     | -0.03 (-0.09, 0.02) | -0.03 (-0.09, 0.02) |
| . Quartile 3              |     | -0.01 (-0.06, 0.04) | -0.01 (-0.07, 0.04) |
| . Quartile 4              |     | 0.00 (-0.06, 0.05)  | 0.01 (-0.05, 0.06)  |

|                           |     |                     |                     |                     |
|---------------------------|-----|---------------------|---------------------|---------------------|
| Juice                     | 504 |                     |                     |                     |
| . Quartile 1              |     | 0.0 (ref)           | 0.0 (ref)           | 0.0 (ref)           |
| . Quartile 2              |     | -0.03 (-0.08, 0.03) | -0.03 (-0.09, 0.03) | -0.02 (-0.08, 0.03) |
| . Quartile 3              |     | -0.02 (-0.08, 0.03) | -0.02 (-0.07, 0.04) | -0.01 (-0.07, 0.04) |
| . Quartile 4              |     | 0.03 (-0.03, 0.08)  | 0.03 (-0.03, 0.08)  | 0.03 (-0.02, 0.09)  |
| Total fructose            | 504 |                     |                     |                     |
| . Quartile 1              |     | 0.0 (ref)           | 0.0 (ref)           | 0.0 (ref)           |
| . Quartile 2              |     | -0.02 (-0.08, 0.03) | -0.02 (-0.07, 0.04) | -0.02 (-0.07, 0.04) |
| . Quartile 3              |     | -0.03 (-0.09, 0.02) | -0.04 (-0.09, 0.02) | -0.04 (-0.09, 0.02) |
| . Quartile 4              |     | -0.01 (-0.06, 0.05) | 0.00 (-0.06, 0.05)  | -0.01 (-0.06, 0.05) |
| <i>Early childhood</i>    |     |                     |                     |                     |
| Sugar sweetened beverages | 450 |                     |                     |                     |
| . Quartile 1              |     | 0.0 (ref)           | 0.0 (ref)           | 0.0 (ref)           |
| . Quartile 2              |     | 0.01 (-0.05, 0.07)  | 0.02 (-0.04, 0.08)  | 0.02 (-0.04, 0.08)  |
| . Quartile 3              |     | -0.04 (-0.10, 0.02) | -0.03 (-0.09, 0.04) | -0.02 (-0.09, 0.04) |
| . Quartile 4              |     | 0.01 (-0.04, 0.06)  | 0.02 (-0.03, 0.08)  | 0.03 (-0.03, 0.08)  |
| Juice                     | 450 |                     |                     |                     |
| . Quartile 1              |     | 0.0 (ref)           | 0.0 (ref)           | 0.0 (ref)           |
| . Quartile 2              |     | 0.00 (-0.05, 0.05)  | -0.01 (-0.06, 0.05) | 0.00 (-0.05, 0.05)  |
| . Quartile 3              |     | 0.00 (-0.06, 0.06)  | 0.00 (-0.06, 0.06)  | 0.00 (-0.07, 0.06)  |
| . Quartile 4              |     | 0.01 (-0.04, 0.07)  | 0.00 (-0.05, 0.06)  | 0.01 (-0.05, 0.07)  |
| Total fructose            | 450 |                     |                     |                     |
| . Quartile 1              |     | 0.0 (ref)           | 0.0 (ref)           | 0.0 (ref)           |
| . Quartile 2              |     | 0.01 (-0.04, 0.07)  | 0.02 (-0.04, 0.08)  | 0.01 (-0.05, 0.07)  |
| . Quartile 3              |     | 0.04 (-0.02, 0.09)  | 0.04 (-0.02, 0.10)  | 0.03 (-0.03, 0.09)  |
| . Quartile 4              |     | -0.01 (-0.07, 0.04) | -0.01 (-0.07, 0.04) | -0.01 (-0.07, 0.04) |

Model 0. Unadjusted

Model 1. Adjusted for maternal education, smoking during pregnancy, and pre-pregnancy body mass index; household income; and child age, sex, and race/ethnicity.

Early childhood exposures additionally adjusted for mother's sugar sweetened beverage intake (1<sup>st</sup> and 2<sup>nd</sup> trimester average).

Model 2. Model 1 additionally adjusted for child body mass index z-score in mid-childhood.

**Figure E1.** Distribution of reported intake of fructose-rich beverages in mothers and children in Project Viva (N=1068)

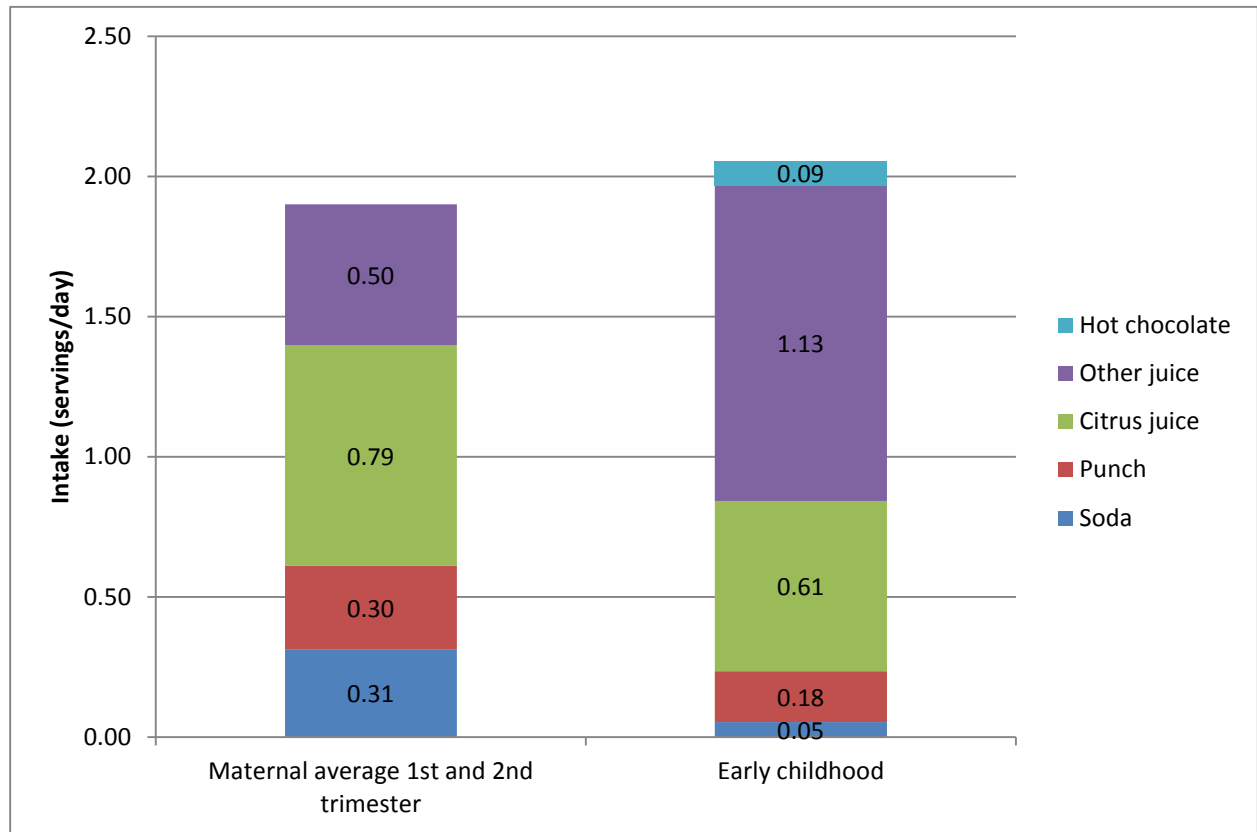

Supplement: AnnalsATS.201707-530OC_wright_data_supplement.pdf [file AnnalsATS.201707-530OC_wright_data_supplement.pdf]
